# Supplementary material
Source: PubMed Central journal article supplement (PMC5070746)
Supplement: aasm.39.11.1919s1.pdf [file aasm.39.11.1919s1.pdf]

**Table S1—HRs for short sleep duration, complete cases only, in the SDPI-DP**

|                                                  | n     | ≤ 6 hours sleep/night |
|--------------------------------------------------|-------|-----------------------|
|                                                  |       | HR (95% CI)           |
| Model 0: sleep                                   | 1,200 | 1.84 (1.21-2.80)      |
| Model 1: sleep + age + sex                       | 1,200 | 1.83 (1.20-2.78)      |
| Model 2: model 1 + socioeconomic characteristics | 1,200 | 1.86 (1.21-2.83)      |
| Model 3: model 2 + health behaviors              | 1,200 | 1.85 (1.21-2.83)      |
| Model 4: model 3 + health status                 | 1,200 | 1.68 (1.09-2.58)      |
| Model 5: model 4 + BMI                           | 1,200 | 1.61 (1.05-2.48)      |
| Model 6: model 5 + % weight loss post-curriculum | 1,200 | 1.39 (0.90-2.16)      |

**Table S2—HRs, by reported sleep duration, with 6-8 hours as reference, in the SDPI-DP**

|                                                   | ≤ 5 hours<br>sleep/night | 6-8 hours<br>sleep/night | ≥ 9 hours<br>sleep/night |
|---------------------------------------------------|--------------------------|--------------------------|--------------------------|
|                                                   | HR (95% CI)              | HR (95% CI)              | HR (95% CI)              |
| Model 0: sleep                                    | 1.47 (0.96-2.25)         | 1.00 (ref)               | 1.12 (0.60-2.07)         |
| Model 1: sleep + age + sex                        | 1.46 (0.96-2.24)         | 1.00 (ref)               | 1.14 (0.61-2.11)         |
| Model 2: model 1 + socioeconomic characteristics* | 1.42 (0.92-2.18)         | 1.00 (ref)               | 1.14 (0.61-2.11)         |
| Model 3: model 2 + health behaviors^              | 1.43 (0.92-2.20)         | 1.00 (ref)               | 1.10 (0.59-2.06)         |
| Model 4: model 3 + health status†                 | 1.33 (0.86-2.07)         | 1.00 (ref)               | 1.10 (0.59-2.05)         |
| Model 5: model 4 + BMI                            | 1.27 (0.82-1.97)         | 1.00 (ref)               | 1.11 (0.60-2.07)         |
| Model 6: model 5 + % weight loss post-curriculum  | 1.21 (0.76-1.92)         | 1.00 (ref)               | 1.06 (0.53-2.10)         |

Includes participants who completed all 16 classes and had at least one follow-up assessment, based on multiply imputed data

\*employment status, income, education, marital status

^RAPA1, unhealthy diet, AUDIT, smoking

†SCQ, General Health
